# Supplementary material
Source: Springer Nature journal article supplement (https://www.springermedizin.de/resource/supplementary/12906_2012_1251_MOESM9_ESM.pdf/9520040)

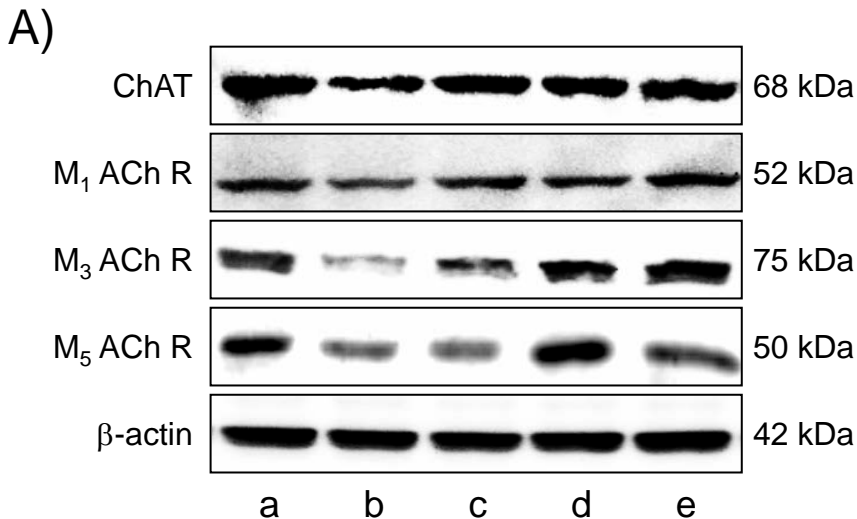

- a *m/m* control  
 b *db/db* control  
 c *db/db* + CTS (375)  
 d *db/db* + CTS (750)  
 e *db/db* + THA (2.5)

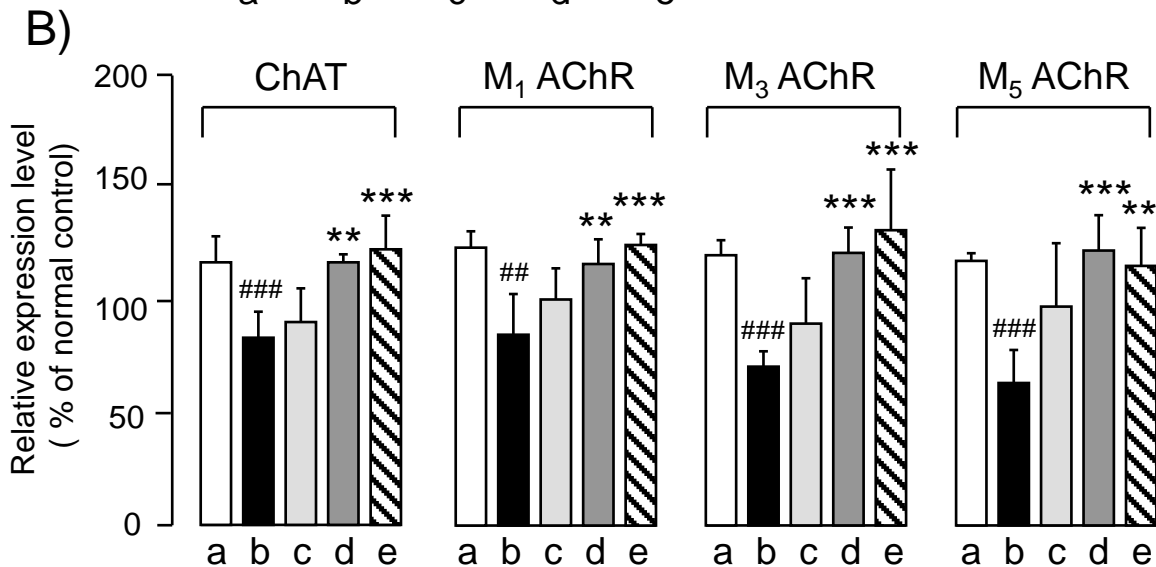

Supplement: MOESM9 [file 9520040]
